# Supplementary material
Source: PubMed Central journal article supplement (PMC3703549)

**A ZO1**

Control

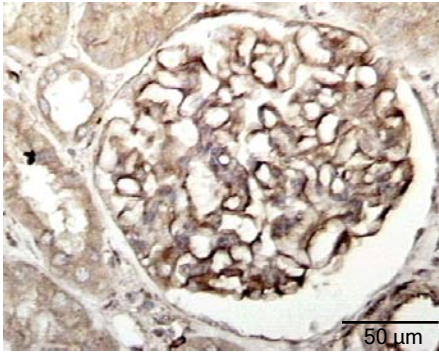

Untreated

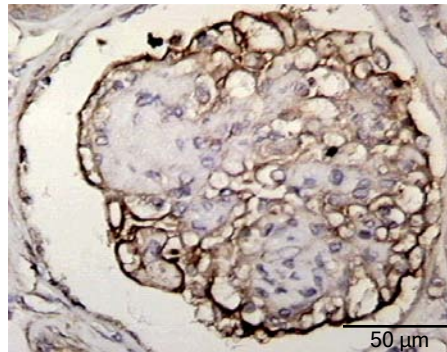

Ramipril

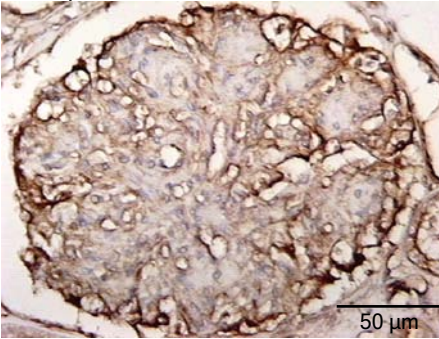

(-)

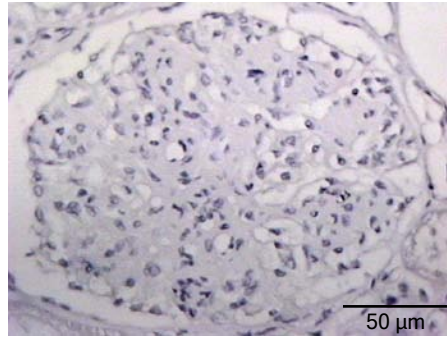

**B CD2AP**

Control

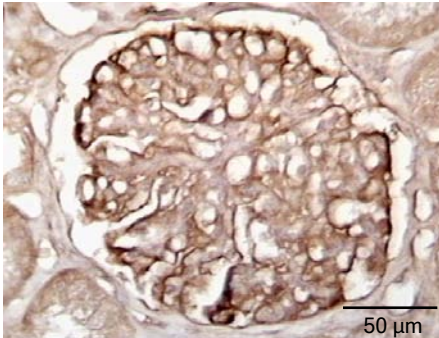

Untreated

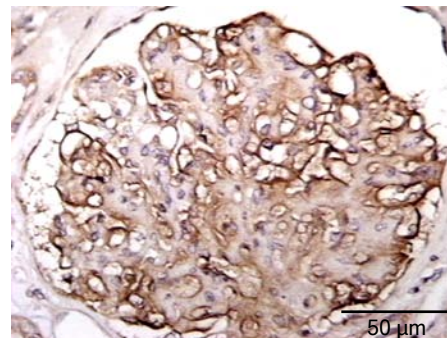

Ramipril

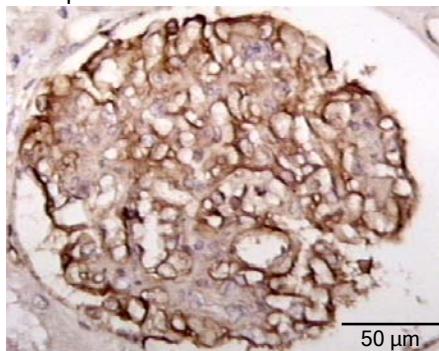

(-)

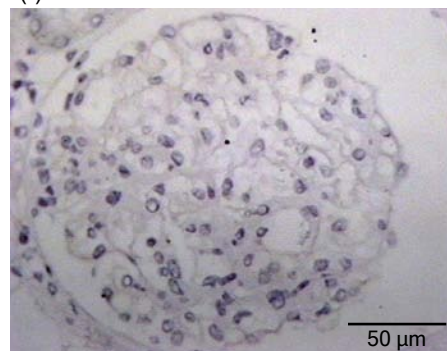

Supplement: mmc1.pdf [file mmc1.pdf]
